# Supplementary material for: The Use of Selected Ion Flow Tube-Mass Spectrometry Technology to Identify Breath Volatile Organic Compounds for the Detection of Head and Neck Squamous Cell Carcinoma: A Pilot Study
Source: PubMed Central journal article supplement (PMC6631766; doi:10.3390/medicina55060306), 2019-06-25
Supplement: medicina-55-00306-s001.pdf [file medicina-55-00306-s001.pdf]

**Table 1.** Median Values of all Volatile Organic Compounds.

| Volatile Organic Compounds | Median  |        |
|----------------------------|---------|--------|
|                            | Healthy | Cancer |
| 1,6-dihydrocarveol         | 1.94    | 1.86   |
| 2-propanol                 | 31      | 34.8   |
| 3-methylhexane             | 11.35   | 11.6   |
| isobutanoic acid           | 3.065   | 2.92   |
| isopropylamine             | 1.01    | 1.19   |
| methanol                   | 14.5    | 11.2   |
| p-xylene                   | 1.06    | 1.14   |
| 1-octene                   | 4.635   | 4.94   |
| 1-propanol                 | 31.95   | 36.3   |
| acetophenone               | 0.917   | 0.65   |
| benzoic acid               | 0.609   | 0.63   |
| cyclohexanone              | 4.01    | 4.17   |
| dodecane                   | 1.63    | 1.71   |
| isopentane                 | 5.52    | 5.31   |
| methyl n-propyl sulfide    | 2.88    | 2.9    |
| pentanal                   | 2.99    | 2.59   |
| 2-methoxy-2-methyl butane  | 4.26    | 4.12   |
| 3-hexanone                 | 3.75    | 3.27   |
| Freon 113                  | 3.01    | 2.8    |
| acetoin                    | 1.975   | 2.11   |
| formaldehyde               | 6       | 8.08   |
| furan                      | 20.5    | 23.1   |
| hydrogen cyanide           | 1.115   | 2.52   |
| isooctane                  | 4.25    | 4.17   |
| toluene                    | 0.7735  | 0.79   |
| 1,2,4-trimethylbenzene     | 1.03    | 1      |
| camphor                    | 0.957   | 0.8    |
| dimethyl disulfide         | 1.05    | 0.93   |
| ethane                     | 0.7415  | 0.69   |
| hexanal                    | 4.77    | 4.84   |
| pentane                    | 13.45   | 16     |
| 3-methylhexane             | 11.35   | 11.5   |
| benzene                    | 2.435   | 3.35   |
| methylcyclopentane         | 1.31    | 1.5    |
| propylbenzene              | 1.09    | 1.15   |
| tridecane                  | 1.6     | 1.67   |
| acetone                    | 90.65   | 112    |
| decane                     | 3.305   | 3.33   |
| heptanal                   | 2.265   | 2.23   |
| isoprene                   | 30.9    | 36     |
| styrene                    | 1.6     | 0.77   |
| 2-methylpentane            | 9.17    | 9.62   |
| 4-methyloctanoic acid      | 1.8     | 1.71   |
| N2 isopentane              | 7.965   | 7.73   |
| N2 m-xylene                | 1.04    | 1.14   |
| decanal                    | 1.875   | 1.47   |
| methyl cyclohexane         | 1.42    | 1.44   |
| methyl isobutyl ketone     | 4.535   | 4.67   |
| methylcyclopentane         | 1.31    | 1.5    |
| nonanal                    | 3.645   | 2.86   |
| 1,3-butadiene              | 0.2165  | 0.3    |
| 1,4-benzoquinone           | 1.22    | 1.09   |

---

|                             |        |       |
|-----------------------------|--------|-------|
| N2 1,1-dichloroethane       | 4.635  | 4.56  |
| N2 2-methylundecanal        | 2.105  | 2.02  |
| acetophenone                | 0.911  | 0.6   |
| butanone                    | 2.365  | 1.96  |
| cyclopropane                | 70     | 88.6  |
| furfural                    | 0.612  | 0.72  |
| longifolene                 | 0.7215 | 0.76  |
| octanal                     | 3.12   | 2.58  |
| 1,4-diaminobutane           | 2.27   | 2.67  |
| 3-methylbutanoic acid       | 1.975  | 2.16  |
| ammonia                     | 31.2   | 33.9  |
| butanoic acid               | 2.77   | 2.98  |
| dimethyl sulfide            | 1.695  | 1.73  |
| hydrogen sulfide            | 4.365  | 4.51  |
| indole                      | 0.3005 | 0.35  |
| methyl mercaptan            | 1.135  | 1.83  |
| 1,5-diaminopentane          | 1.0065 | 1.25  |
| 3-methylindole              | 0.335  | 0.35  |
| trimethylamine              | 9.48   | 12.8  |
| N2 butanoic acid            | 2.28   | 2.7   |
| acetic acid                 | 15.8   | 17.05 |
| formic acid                 | 20.8   | 24.3  |
| pentanoic acid              | 2.27   | 2.545 |
| propanoic acid              | 2.09   | 2.54  |
| 1-octene                    | 4.635  | 4.94  |
| 2,2-dimethyl propanoic acid | 2.485  | 2.32  |
| 2,3-butanediol              | 3.89   | 4.57  |
| acrylonitrile               | 0.3035 | 0.33  |
| butanone                    | 2.375  | 1.96  |
| ethanol                     | 16.5   | 19.1  |
| limonene                    | 0.9975 | 0.88  |
| undecane                    | 3.06   | 2.48  |

---
